# Supplementary material for: Comparative effectiveness of oral antidiabetic drugs in preventing cardiovascular mortality and morbidity: A network meta-analysis
Source: PLOS journal article supplement (doi:10.1371/journal.pone.0177646), 2017-05-25

# S7 Fig. Network meta-analysis for cardiovascular-related mortality

A=placebo. B=metformin. C=sulfonylurea. D=thiazolidinedione (TZD). E=dipeptidyl peptidase-4 (DPP4) inhibitor. F=sodium glucose cotransporter-2 (SGLT2) inhibitor.

## S7A Fig. Network plot of oral antidiabetic drugs comparison of cardiovascular-related mortality

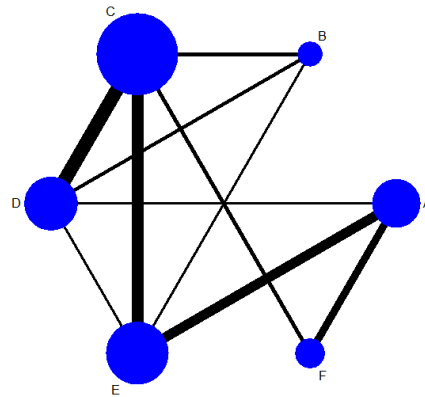

## S7B Fig. Contribution plot of oral antidiabetic drugs comparison for cardiovascular-related mortality

|                                 |                 | Direct comparisons in the network |      |      |      |      |      |      |      |      |      |
|---------------------------------|-----------------|-----------------------------------|------|------|------|------|------|------|------|------|------|
|                                 |                 | AvsD                              | AvsE | AvsF | BvsC | BvsD | BvsE | CvsD | CvsE | CvsF | DvsE |
| Network meta-analysis estimates | Mixed estimates |                                   |      |      |      |      |      |      |      |      |      |
|                                 | AvsD            | 84.1                              |      | 0.6  | 0.3  | 0.6  | 0.3  | 4:0  | 3:7  | 0.6  | 0.9  |
|                                 | AvsE            | 1.6                               | 95.2 |      | 0.1  | 0.2  | 0.1  | 1:1  | 1:3  | 0.1  | 0.3  |
|                                 | AvsF            | 0.6                               | 0.4  | 97.2 |      | 0.1  |      | 0.5  | 0.3  | 0.9  |      |
|                                 | BvsC            | 3:3                               | 2:3  | 1.0  | 58.4 | 13:8 | 3:7  | 10:5 | 6:0  | 1:0  |      |
|                                 | BvsD            | 13:8                              | 12:2 | 1:6  | 29.1 | 11:2 | 2:9  | 18:0 | 9:5  | 1:6  | 0.2  |
|                                 | BvsE            | 20:3                              | 21:7 | 1:4  | 22.8 | 8:4  | 2:4  | 12:1 | 9:2  | 1:4  | 0.3  |
|                                 | CvsD            | 19:9                              | 17:1 | 2:7  | 5:2  | 4:2  | 1:0  | 30:4 | 16:4 | 2:7  | 0.3  |
|                                 | CvsE            | 24:0                              | 26:4 | 2:4  | 3:9  | 2:9  | 1:0  | 21:4 | 15:2 | 2:4  | 0.3  |
|                                 | CvsF            | 19:2                              | 12:3 | 31:5 | 3:1  | 2:3  | 0.7  | 17:1 | 11:4 | 2:2  | 0.2  |
|                                 | DvsE            | 46.1                              | 46.4 | 0.3  | 0.2  | 0.5  | 0.2  | 2:8  | 2:7  | 0.3  | 0.6  |
| Indirect estimates              |                 |                                   |      |      |      |      |      |      |      |      |      |
|                                 | AvsB            | 23.1                              | 12:6 | 1:6  | 25.3 | 9:4  | 2:6  | 13:9 | 9:7  | 1:6  | 0.2  |
|                                 | AvsC            | 27.5                              | 17:5 | 2:7  | 4:4  | 3:4  | 1:0  | 24:4 | 16:3 | 2:7  | 0.2  |
|                                 | BvsF            | 17:2                              | 9:3  | 26:5 | 19:0 | 7:0  | 1:9  | 10:3 | 7:2  | 1:5  | 0.2  |
|                                 | DvsF            | 44.5                              | 2:4  | 46.9 | 0.2  | 0.4  | 0.2  | 2:3  | 1:8  | 0.8  | 0.5  |
|                                 | EvsF            | 0.5                               | 48.5 | 49.0 |      | 0.1  | 0.1  | 0.3  | 0.8  | 0.5  | 0.1  |
| Entire network                  |                 | 22.6                              | 20.0 | 16.4 | 12:3 | 4:8  | 1:3  | 12:4 | 8:3  | 1:5  | 0.3  |
| Included studies                |                 | 1                                 | 5    | 4    | 2    | 2    | 1    | 7    | 6    | 2    | 1    |

**S7C Fig.** Inconsistency plot for cardiovascular-related mortality of oral antidiabetic drugs assuming loop-specific heterogeneity estimates

The plot represents that in a total of 7 loops there is none with statistically significant inconsistency as all confidence intervals for RoRs are compatible with zero inconsistency (RoR=1).

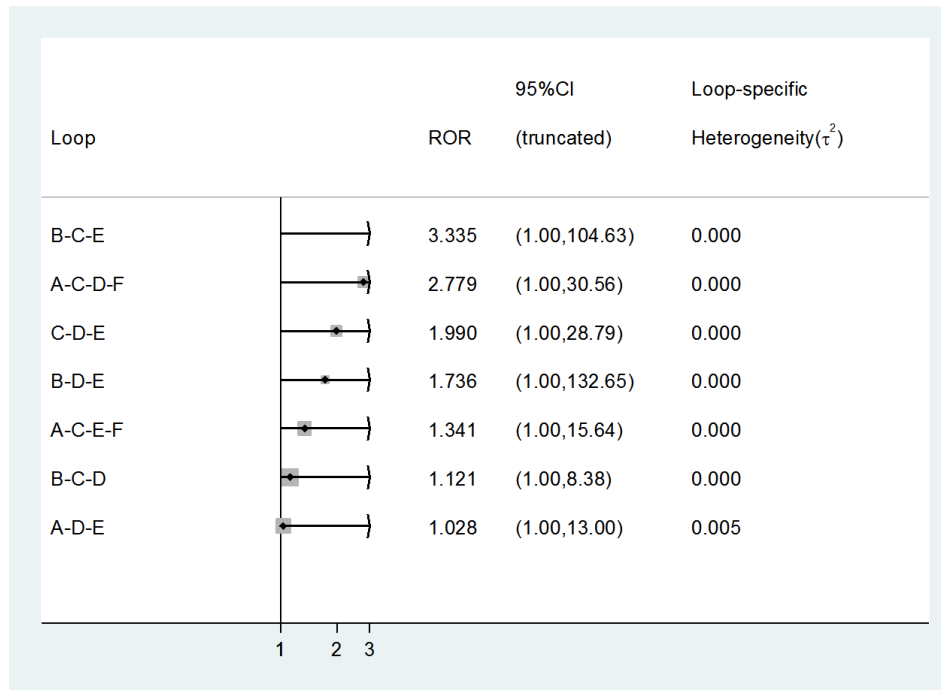

**S7D Fig.** Comparison-adjusted funnel plot for network meta-analysis for cardiovascular-related mortality of oral antidiabetic drugs

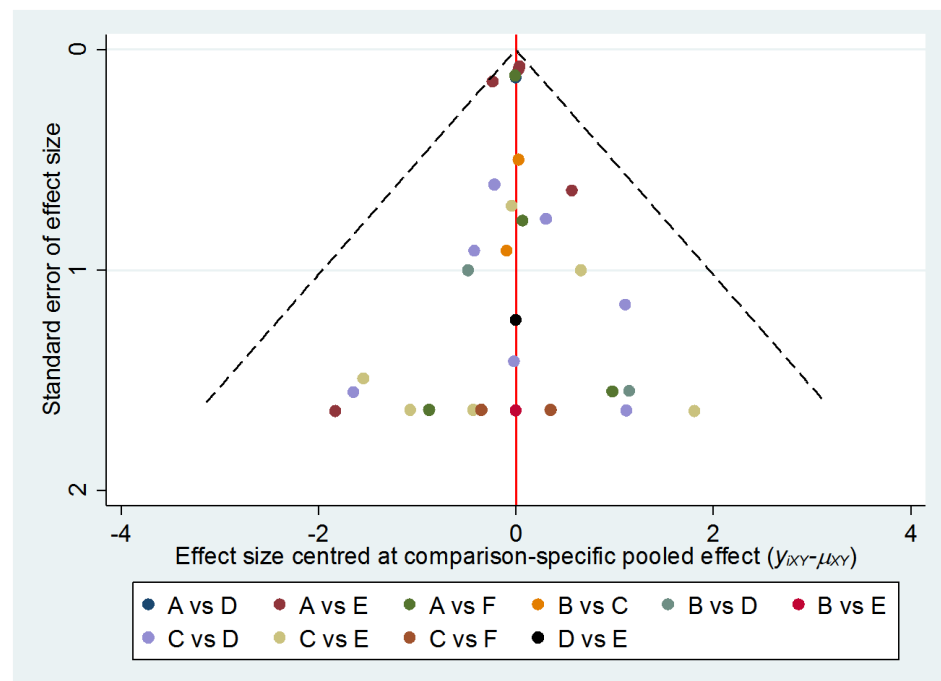

Supplement: S11 (10.1371/journal.pone.0177646.s011) [file journal.pone.0177646.s011]
